# Supplementary material
Source: PubMed Central journal article supplement (PMC6547094)
Supplement: jamaneurol-76-834-s001.pdf [file jamaneurol-76-834-s001.pdf]

## Supplementary Online Content

Deen M, Hougaard A, Hansen HD, et al. Association between sumatriptan treatment during a migraine attack and central 5-HT<sub>1B</sub> receptor binding. *JAMA Neurol*. Published online May 28, 2019. doi:10.1001/jamaneurol.2019.0755

**eTable 1.** PET Variables

**eTable 2.** Clinical Characteristics of Spontaneous and Cilostazol Induced Migraine Attacks

This supplementary material has been provided by the authors to give readers additional information about their work.

**eTable 1. PET Variables**

|                                                             | <b>Interictal</b> | <b>Ictal</b> | <b>Postictal</b> | <b>Ictal vs. interictal</b> | <b>Ictal vs. postictal</b> |
|-------------------------------------------------------------|-------------------|--------------|------------------|-----------------------------|----------------------------|
| <b>AZ injected mass per kg (microgram/kg)</b>               | 0.01±0.01         | 0.01±0.004   | 0.02±0.02        | p = 0.48                    | p = 0.31                   |
| <b>AZ Time-normalized AUC-CB (Bq/ml)/AZ Inj. Dose (MBq)</b> | 10.1±2.08         | 8.8±1.6      | 8.5±1.5          | p = 0.06                    | p = 0.29                   |

AUC = Area Under the Curve.

**eTable 2.** Clinical Characteristics of Spontaneous and Cilostazol Induced Migraine Attacks

| Subject | Migraine | Unilateral/<br>bilateral | NRS | Pulsating | Worsens<br>with<br>activity | Nausea | Vomit | Photo | Phono |
|---------|----------|--------------------------|-----|-----------|-----------------------------|--------|-------|-------|-------|
| 1       | Spon     | U                        | 7   | 1         | 1                           | 1      | 1     | 1     | 1     |
|         | Cilo     | U                        | 7   | 1         | 1                           | 0      | 0     | 1     | 1     |
| 2       | Spon     | U                        | 8   | 1         | 1                           | 1      | 0     | 1     | 0     |
|         | Cilo     | B                        | 7   | 1         | 1                           | 1      | 0     | 1     | 0     |
| 3       | Spon     | B                        | 7   | 0         | 1                           | 1      | 0     | 1     | 1     |
|         | Cilo     | B                        | 7   | 0         | 1                           | 1      | 1     | 1     | 1     |
| 4       | Spon     | U                        | 8   | 1         | 1                           | 1      | 1     | 1     | 1     |
|         | Cilo     | B                        | 8   | 1         | 1                           | 1      | 0     | 1     | 1     |
| 5       | Spon     | B                        | 8   | 1         | 1                           | 1      | 0     | 1     | 1     |
|         | Cilo     | B                        | 7   | 1         | 1                           | 1      | 0     | 1     | 1     |
| 6       | Spon     | B                        | 9   | 1         | 1                           | 1      | 1     | 1     | 1     |
|         | Cilo     | B                        | 8   | 1         | 1                           | 1      | 0     | 1     | 1     |
| 7       | Spon     | U                        | 8   | 1         | 1                           | 1      | 0     | 1     | 1     |
|         | Cilo     | U                        | 9   | 1         | 1                           | 0      | 0     | 1     | 1     |
| 8       | Spon     | U                        | 8   | 0         | 1                           | 0      | 0     | 1     | 1     |
|         | Cilo     | U                        | 8   | 0         | 1                           | 0      | 0     | 1     | 1     |

NRS = Numerical Rating Scale 0-10. Photo = Photophobia. Phono = Phonophobia. Spon = Spontaneous. Cilo = Cilostazol induced. U = Unilateral. B = Bilateral. 1 = Yes. 0 = No.
